# Supplementary material
Source: publisher site journal article supplement (https://www.dovepress.com/article/600434)
Supplement: Supplementary file 1 [file 600434%20Supplementary%20Table%20S1.docx]

Supplementary Table S1. FDA and NMPA approval information for targeted therapies included in this review.

| Drug | Regulatory Agency | Source Link | Accessed Date |
| --- | --- | --- | --- |
| Gefitinib | FDA | <https://www.accessdata.fda.gov/scripts/cder/daf/index.cfm?event=overview.process&ApplNo=206995.> | 21-Jan-25 |
| Erlotinib | FDA | <https://www.accessdata.fda.gov/scripts/cder/daf/index.cfm?event=overview.process&ApplNo=021743.> | 21-Jan-25 |
| Afatinib | FDA | <https://www.accessdata.fda.gov/scripts/cder/daf/index.cfm?event=overview.process&ApplNo=201292.> | 21-Jan-25 |
| Dacomitinib | FDA | <https://www.accessdata.fda.gov/scripts/cder/daf/index.cfm?event=overview.process&ApplNo=211288.> | 21-Jan-25 |
| Osimertinib | FDA | <https://www.accessdata.fda.gov/scripts/cder/daf/index.cfm?event=overview.process&ApplNo=208065.> | 21-Jan-25 |
| Icotinib | NMPA | <https://www.nmpa.gov.cn/datasearch/home-index.html.> | 21-Jan-25 |
| Almonertinib | NMPA | <https://www.nmpa.gov.cn/datasearch/home-index.html.> | 21-Jan-25 |
| Crizotinib | FDA | <https://www.accessdata.fda.gov/scripts/cder/daf/index.cfm?event=overview.process&ApplNo=202570.> | 21-Jan-25 |
| Alectinib | FDA | <https://www.accessdata.fda.gov/scripts/cder/daf/index.cfm?event=overview.process&ApplNo=208434.> | 21-Jan-25 |
| Ceritinib | FDA | <https://www.accessdata.fda.gov/scripts/cder/daf/index.cfm?event=overview.process&ApplNo=205755.> | 21-Jan-25 |
| Brigatinib | FDA | <https://www.accessdata.fda.gov/scripts/cder/daf/index.cfm?event=overview.process&ApplNo=208772.> | 21-Jan-25 |
| Lorlatinib | FDA | <https://www.accessdata.fda.gov/scripts/cder/daf/index.cfm?event=overview.process&ApplNo=210868.> | 21-Jan-25 |
| Entrectinib | FDA | <https://www.accessdata.fda.gov/scripts/cder/daf/index.cfm?event=overview.process&ApplNo=212725.> | 21-Jan-25 |
| Repotrectinib | FDA | <https://www.fda.gov/drugs/resources-information-approved-drugs/fda-approves-repotrectinib-ros1-positive-non-small-cell-lung-cancer.> | 21-Jan-25 |
| Taletrectinib | FDA | <https://www.fda.gov/drugs/resources-information-approved-drugs/fda-approves-taletrectinib-ros1-positive-non-small-cell-lung-cancer.> | 21-Jan-25 |
| Selpercatinib | FDA | <https://www.accessdata.fda.gov/scripts/cder/daf/index.cfm?event=overview.process&ApplNo=213246.> | 21-Jan-25 |
| Pralsetinib | FDA | <https://www.accessdata.fda.gov/scripts/cder/daf/index.cfm?event=overview.process&ApplNo=214701.> | 21-Jan-25 |
| Larotrectinib | FDA | <https://www.fda.gov/drugs/fda-approves-larotrectinib-solid-tumors-ntrk-gene-fusions-0.> | 21-Jan-25 |
| Trastuzumab deruxtecan | FDA | <https://www.fda.gov/drugs/resources-information-approved-drugs/fda-grants-accelerated-approval-fam-trastuzumab-deruxtecan-nxki-her2-mutant-non-small-cell-lung.> | 21-Jan-25 |
| Zongertinib | FDA | <https://www.fda.gov/drugs/resources-information-approved-drugs/fda-grants-accelerated-approval-zongertinib-non-squamous-nsclc-her2-tkd-activating-mutations.> | 21-Jan-25 |
| Trastuzumab emtansine | FDA | <https://www.accessdata.fda.gov/drugsatfda_docs/label/2013/125427lbl.pdf.> | 21-Jan-25 |
| Sotorasib | FDA | <https://www.fda.gov/drugs/resources-information-approved-drugs/fda-grants-accelerated-approval-sotorasib-kras-g12c-mutated-nsclc.> | 21-Jan-25 |
| Adagrasib | FDA | <https://www.fda.gov/drugs/resources-information-approved-drugs/fda-grants-accelerated-approval-adagrasib-kras-g12c-mutated-nsclc.> | 21-Jan-25 |
| Ramucirumab (Cyramza) | FDA | <https://www.accessdata.fda.gov/scripts/cder/daf/index.cfm.> | 21-Jan-25 |
| Bevacizumab (Avastin) | FDA | <https://www.accessdata.fda.gov/scripts/cder/daf/index.cfm.> | 21-Jan-25 |
| Amivantamab | FDA | <https://www.accessdata.fda.gov/scripts/cder/daf/index.cfm?event=BasicSearch.process&searchTerm=amivantamab.> | 21-Jan-25 |
| Datopotamab deruxtecan | FDA | <https://www.accessdata.fda.gov/scripts/cder/daf/index.cfm?event=BasicSearch.process&searchTerm=datopotamab.> | 21-Jan-25 |
| Telisotuzumab vedotin | FDA | <https://www.accessdata.fda.gov/scripts/cder/daf/index.cfm?event=BasicSearch.process&searchTerm=telisotuzumab.> | 21-Jan-25 |
| Patritumab deruxtecan | FDA | <https://www.accessdata.fda.gov/scripts/cder/daf/index.cfm?event=BasicSearch.process&searchTerm=patritumab.> | 21-Jan-25 |
| Capmatinib | FDA | <https://www.fda.gov/drugs/resources-information-approved-drugs/fda-approves-capmatinib-metastatic-non-small-cell-lung-cancer> | 21-Jan-25 |
| Tepotinib | FDA | <https://www.fda.gov/drugs/resources-information-approved-drugs/fda-approves-tepotinib-metastatic-non-small-cell-lung-cancer> | 21-Jan-25 |
| Dabrafenib | FDA | <https://www.fda.gov/drugs/resources-information-approved-drugs/fda-grants-regular-approval-dabrafenib-and-trametinib-combination-metastatic-nsclc-braf-v600e> | 21-Jan-25 |
| Encorafenib | FDA | <https://www.fda.gov/drugs/resources-information-approved-drugs/fda-approves-encorafenib-binimetinib-metastatic-non-small-cell-lung-cancer-braf-v600e-mutation> | 21-Jan-25 |
